# Supplementary material
Source: PubMed Central journal article supplement (PMC5843610)
Supplement: cmi201649x1.pdf [file cmi201649x1.pdf]

## Supplemental information

### Supplemental figure legend

#### Figure S1. Related to Figure 1

(a) The efficiency of p38a deletion in splenic DC subsets. Splenic DC subsets were sorted from 5 pairs of mice. (b) The Ag cross-presentation ability of CD8<sup>+</sup> cDCs from p38 $\alpha^{\Delta\text{HPC}}$  mice was reduced. (c) The cross-presentation of OVA protein (100 ug/ml) by BM-derived CD24<sup>+</sup> cDCs of p38 $\alpha^{\Delta\text{HPC}}$  mice was reduced. (d-f) Splenic CD8<sup>+</sup> cDCs from WT or p38 $\alpha^{\Delta\text{DC}}$  mice were coated with OVA<sub>323-339</sub> (1 ug/ml) or OVA protein (100 ug/ml) for 2 hrs at 37 °C, then CD8<sup>+</sup> cDCs (0.25-1×10<sup>4</sup>/well) were incubated with CFSE-labeled OT-II CD4<sup>+</sup> T cells (1×10<sup>5</sup>/well) in a 96-well plate for 60-80 h. T cell proliferation was measured by flow cytometry analysis. The medium used was RPMI1640-10%FBS-1% P/S (penicillin and streptomycin) with GM-CSF (20 ng/ml). (b-f) The results were representative of two independent experiments, each included duplicated samples. The results were presented as mean +/- SEM. \*, p < 0.05; \*\*, p < 0.01; \*\*\*, p < 0.001.

#### Figure S2. Related to Figure 2

(a) The Ag direct-presentation ability of CD8<sup>-</sup> cDCs from p38 $\alpha^{\Delta\text{HPC}}$  mice was reduced. (b) The direct-presentation of OVA protein by BM-derived CD24<sup>-</sup> cDCs of p38 $\alpha^{\Delta\text{HPC}}$  mice was reduced. All of the results were representative of two independent experiments, each included duplicated samples. The results were presented as mean +/- SEM. \*, p < 0.05; \*\*, p < 0.01; \*\*\*, p < 0.001.

#### Figure S3. Related to Figure 3

(a) The expressions of co-stimulatory molecules on splenic CD8<sup>+</sup> cDCs and CD8<sup>-</sup> cDCs from WT or p38 $\alpha^{\Delta\text{DC}}$  mice after stimulation by Pam2 (50 nM) and CpG2216 (100 nM) for 16 h. (b and c) p38 $\alpha$  deletion did not influence the apoptosis in DCs. CD8<sup>+</sup> cDCs (b) and CD8<sup>-</sup> cDCs (c), were incubated with OVA protein (100 ug/mL) or Pam2 (50nM) for various times. The cell death was detected by 7-Amino-actinomycin

D (7-AAD) staining. (a-c) The DCs were sorted from more than 5 pairs of mice. All of the results were representative of two independent experiments, each included duplicated samples.

**Figure S4. Related to Figure 4**

(a) The mRNA levels of Nox2 and TAP1 were reduced in BM-derived CD24<sup>+</sup> cDCs of p38 $\alpha^{\Delta\text{HPC}}$  mice after incubation with OVA protein. The results were representative of two independent experiments, each included duplicated samples. (b) Negative control of Ag degradation. BM-derived CD24<sup>+</sup> cDCs were incubated with protease inhibitors at 37 °C for 10 min, and then pulsed with OVA-coated beads at 37 °C for 30 min. After that, cells were removed off free beads and lysed. The recovered beads were stained with FITC conjugated anti-OVA antibody. The results were presented as mean +/- SEM. \*, p < 0.05; \*\*\*, p < 0.001.
