# Supplementary material
Source: PubMed Central journal article supplement (PMC5843610)

Figure S1 (Related to Figure 1)

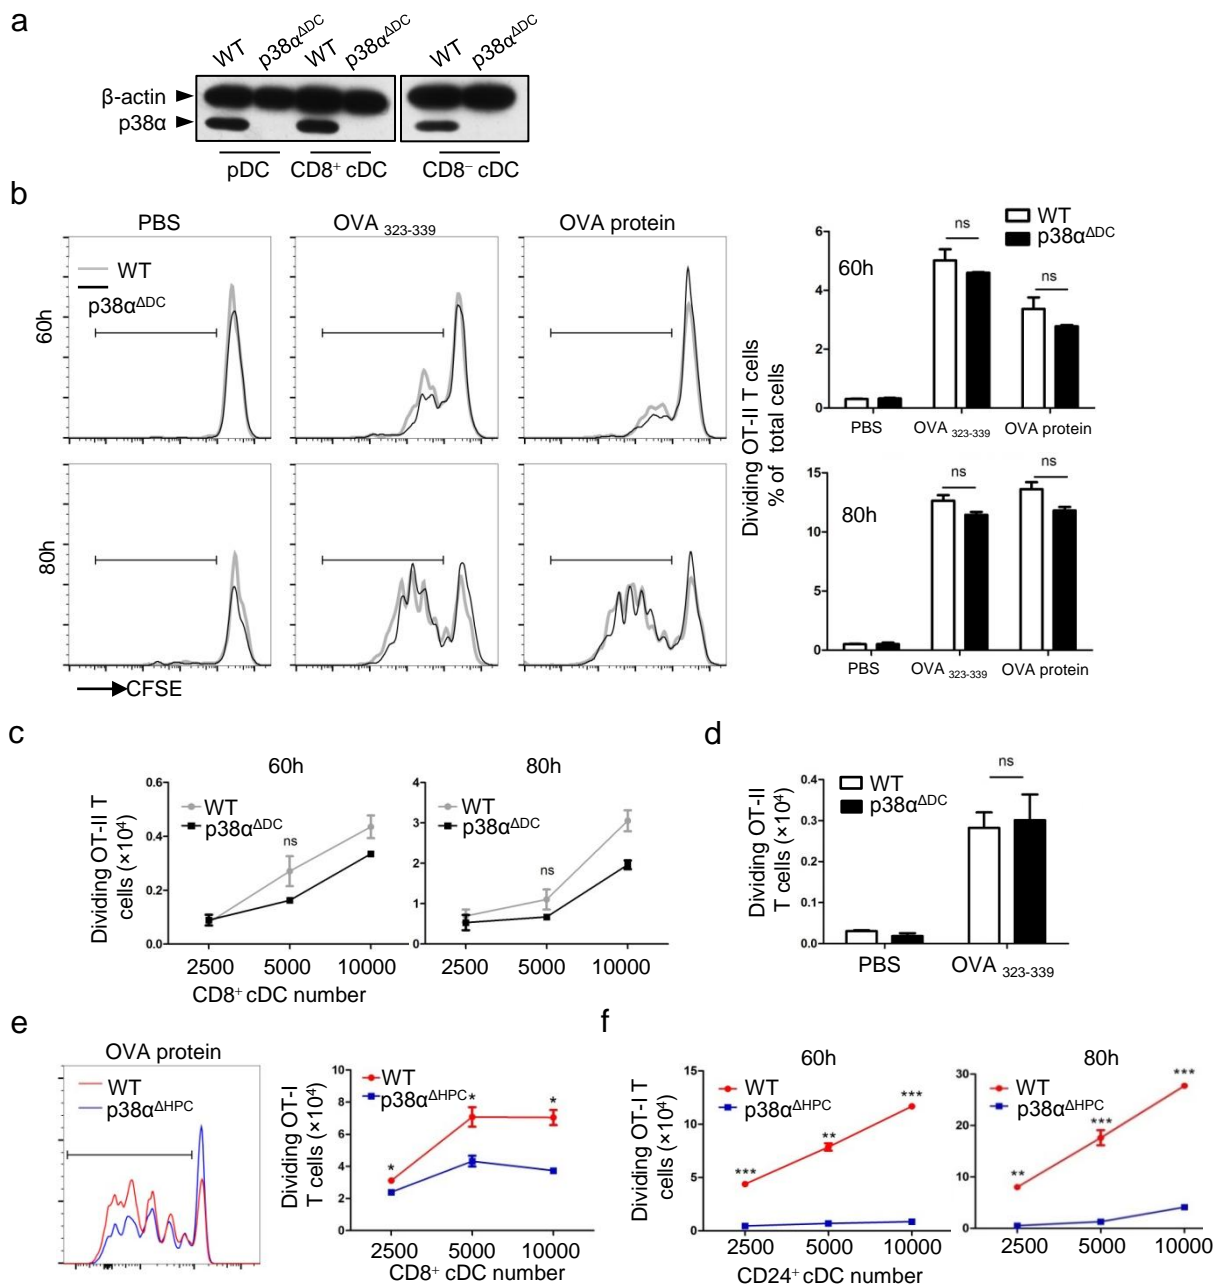

Supplement: cmi201649x2.pdf [file cmi201649x2.pdf]

Figure S2 (Related to Figure 2)

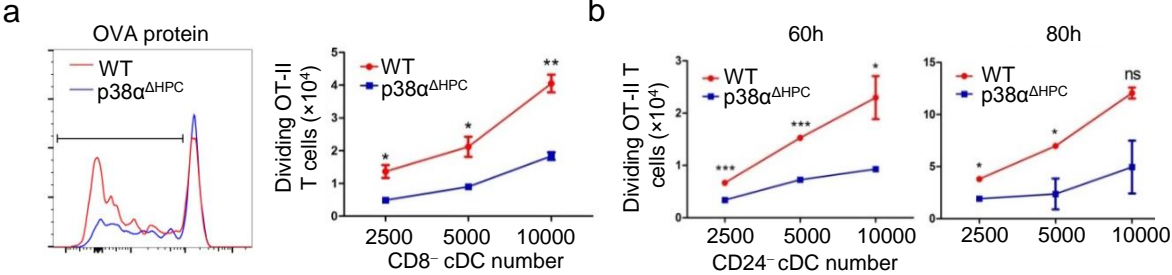

Supplement: cmi201649x3.pdf [file cmi201649x3.pdf]

Figure S3 (Related to Figure 3)

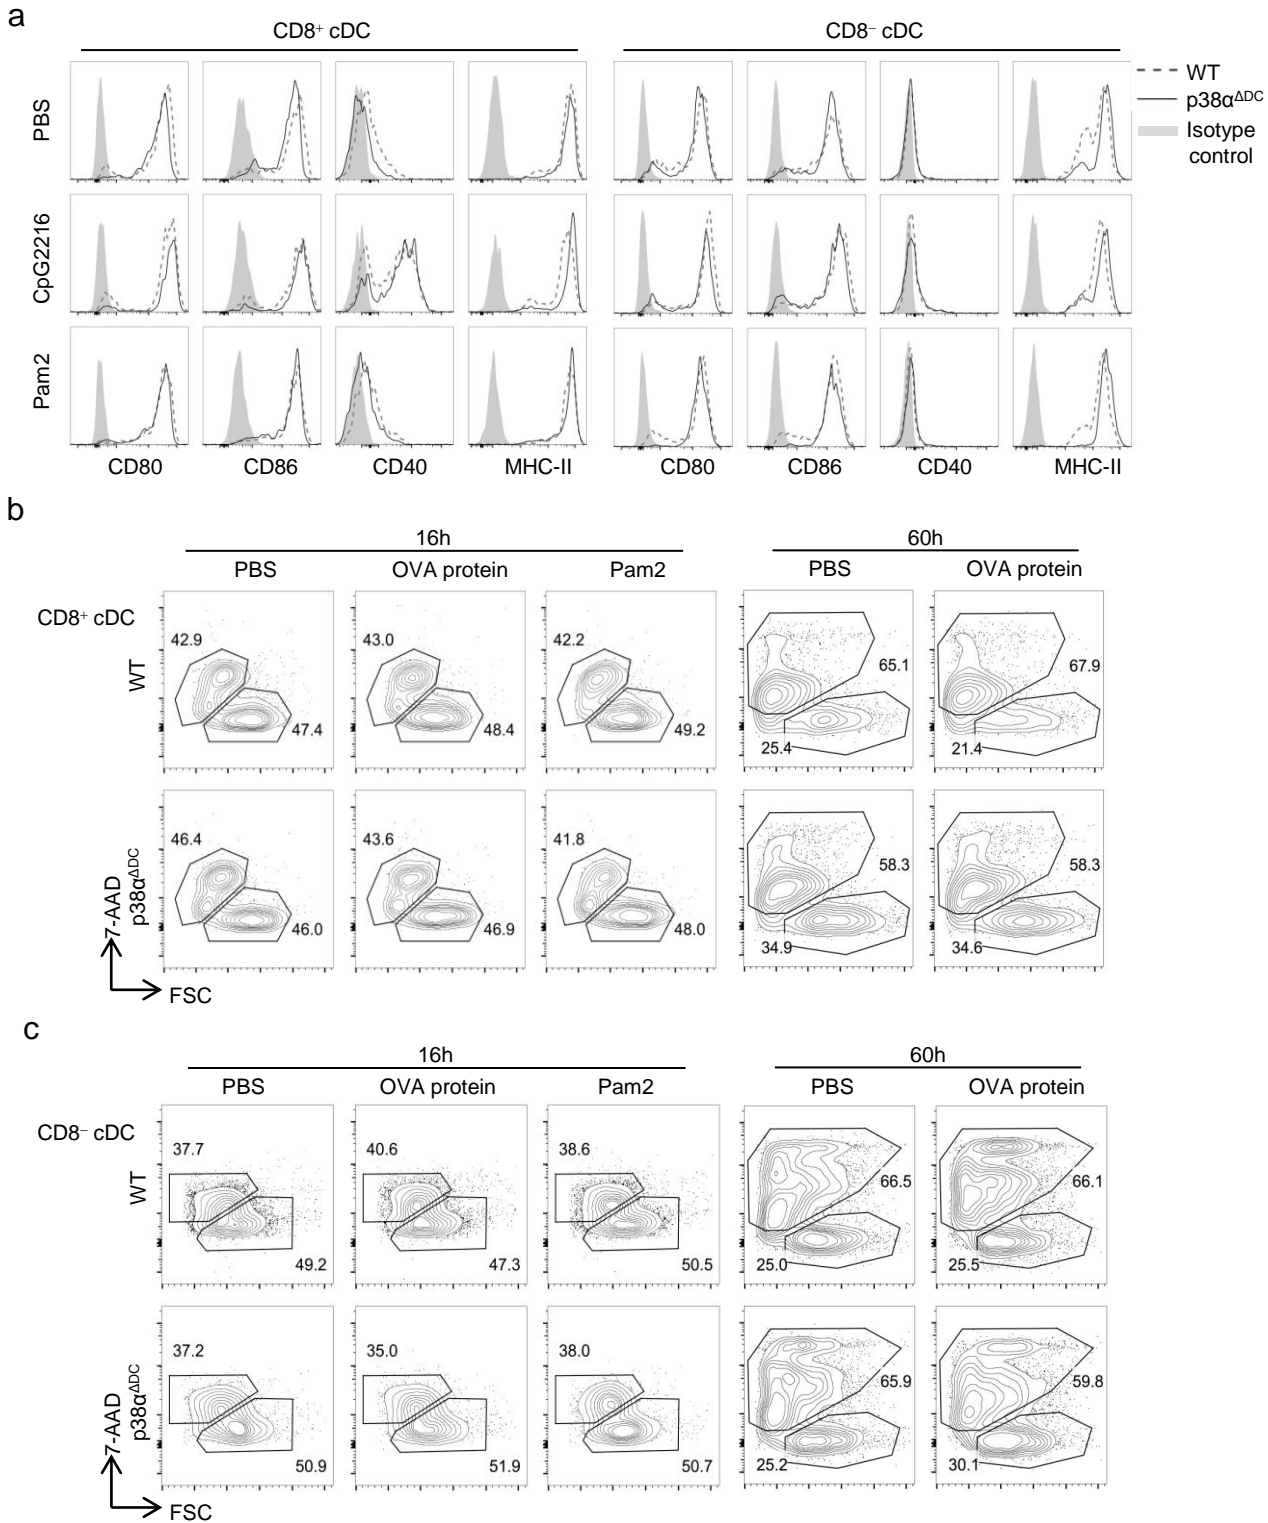

Supplement: cmi201649x4.pdf [file cmi201649x4.pdf]

Figure S4 (Related to Figure 4)

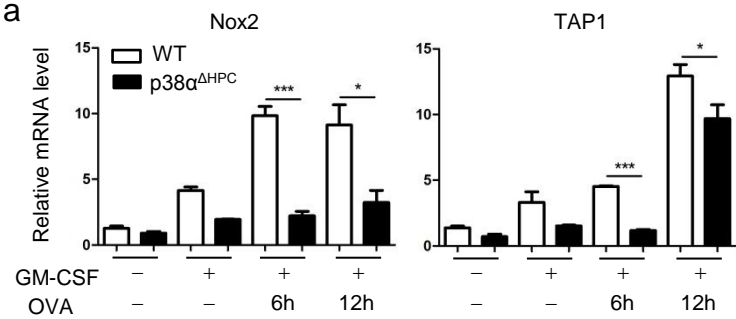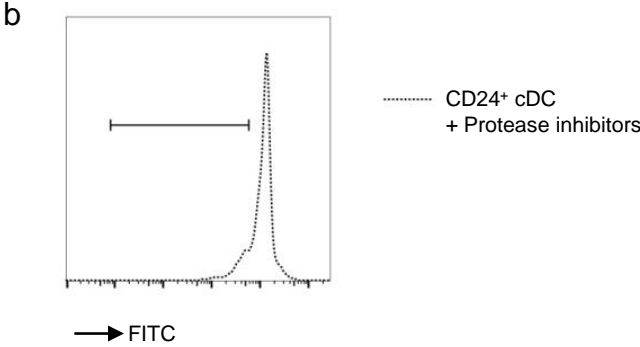

Supplement: cmi201649x5.pdf [file cmi201649x5.pdf]
